# Supplementary material
Source: publisher site journal article supplement (https://www.degruyterbrill.com/publication/isbn/9783110454789/downloadAsset/9783110454789_Zusatzmaterial-Grochowina_Reformation_DGS.zip)
Supplement: Supplementary file 1 [file Kapitel 1 Nachfolge Christi.pdf › Kapitel 1 Nachfolge Christi.pdf]

## **Zusatzmaterial Kapitel 1:**

### **Quelle:**

Auszug aus: Thomas von Kempen: *Imitatio Christi* (1418).

„Die Eigenliebe hält uns am meisten von dem höchsten Gute zurück.

1. Mein Sohn! Für das Ganze musst du dich auch ganz geben und in keinem Stücke mehr dir selbst zugehören. Sei versichert, deine Eigenliebe schadet dir mehr als alles andere in der Welt. Jede Sache wird dir mehr oder weniger ankleben, je nachdem die Liebe und die Neigung, welche du dazu trägst, beschaffen ist. Ist deine Liebe rein, aufrichtig und wohl geordnet, so wirst du dich von irdischen Dingen nicht zuviel einnehmen lassen. Strebe nicht nach Sachen, welche du nicht besitzen darfst, besitze auch nichts, was dich hindern oder dir die innere Freiheit des Geistes rauben könnte. Es ist zu bewundern [= Es ist verwunderlich], dass du dich nicht von ganzem Herzen Mir übergibst samt allem, was du verlangen oder haben kannst.

2. Warum lässt du dich von einer leeren Traurigkeit ganz verzehren? Warum ermüdest du dich mit überflüssigen Sorgen? Richte dich nach Meinem Wohlgefallen, und du wirst keinen Schaden leiden. Wenn du nach dieser oder jener Sache strebst und an diesem oder jenem Orte sein willst, damit du alles füglicher nach deiner Bequemlichkeit und nach deinem Belieben hast, so wirst du nie in Ruhe, nie von ängstlicher Sorge frei sein, weil keine Sache ohne Mangel ist, und weil an jedem Orte etwas dir zuwider sein wird.

3. Deswegen helfen dir äußerliche Dinge, die du erlangt oder vermehrt hast, nichts, sondern vielmehr, wenn du sie verachtest und ganz aus deinem Herzen verbannst. Und dieses ist nicht nur von Geld und Reichtümern zu verstehen, sondern auch von dem Streben nach Ehre und von der Begierde nach eitler Lobe; alles dieses vergeht mit der Welt. Wenig Schutz gewährt ein Ort, wenn der Geist der Inbrunst abgeht und der Friede, welchen man von außen sucht, wird kurzen Bestand haben, wenn es dem Herzen an einem wahren Grunde fehlt, das ist, wenn du dich nicht an Mir festhältst; du kannst wohl den Aufenthalt ändern, aber deswegen bist du doch nicht besser. Denn wenn sich eine Gelegenheit ereignet, oder wenn du sie selbst veranlassest, so wirst du wieder alles das, was du geflohen hast, und noch mehr dazu finden.“

aus: Thomas von Kempen: *Nachfolge Christi*. Übersetzt von Joseph Stark. Augsburg 1788, 73.

### **Information:**

Thomas von Kempen (1380–1471) war im 15. Jahrhundert einer der bedeutsamsten Schriftsteller und Vertreter der *devotio moderna*. Seine „Imitatio Christi“ (erschienen 1418 und anschließend in zahlreiche Sprachen übersetzt) ist bis in die Gegenwart ein weitverbreitetes geistliches Buch. Im Grunde ist diese Schrift der Versuch, zur Nachfolge Christi anzuleiten, indem nicht nur das christliche Leben betrachtet, sondern auch eine gelingende Christusbeziehung ausgeleuchtet wird. Betrachtungen zur Demut, zum angemessenen Umgang mit der Welt, zum immer wieder neu zu erlangende Blick auf die Kreuzeswirklichkeit und der intensive Blick auf den Weg Jesu gehören ebenso dazu wie einzelne Erwägungen, die insbesondere Ordensmenschen in die Pflicht nehmen. Letzteres verwundert nicht, war Thomas von Kempen doch Augustiner-Chorherr und damit ein Ordensmann, der also deshalb das geistliche Leben einer Ordensgemeinschaft im Blick hatte und zu gestalten suchte.

### **Fragen zur Bearbeitung:**

1. Welche Elemente des geistlichen Lebens werden besonders betont?
2. Welches Weltverständnis wird hier deutlich?
3. Wie passt sich diese Schrift in das beginnende reformatorische Geschehen ein?
4. Wie erklärt sich die Popularität des Buches auch im ausgehenden 18. Jahrhundert?
