# Supplementary material
Source: publisher site journal article supplement (https://www.degruyterbrill.com/publication/isbn/9783110454789/downloadAsset/9783110454789_Zusatzmaterial-Grochowina_Reformation_DGS.zip)
Supplement: Supplementary file 2 [file Kapitel 10 Krieg.pdf › Kapitel 10 Krieg.pdf]

## **Zusatzmaterial Kapitel 10:**

### **Quelle:**

Auszug aus: Eyn schoen new Lied auff das INTERIM gemacht/ troestlich zu singen. (1548).

„Ein Krieg hat sich erhaben/ ist jderman bekandt/ Gebracht in grossen schaden/ Das werde Deudsche Landt/ Vorhert vortzert ist manchem sein gut/ Sein weib und kindt geschendet/ Vorgossen vnschuldiges bluth.

Der dis hat angefangen/ ist vns fein wol bekant/ Wolt Gott wer erhangen/ Bapst Teuffel ist ers genandt/ Wol wider die arme Christenheit/ Dat er den Keyser erreget/ Mit seinem geschwornen Eidt.

Den Keiser thut er nützen/ vnd nent jhn seinen Son/ seinen stuel mus er jm schützen/ Darzu die freyfachige Kron/ des mus entgelten das Deudtsche landt/ Gottes Wort ia faren lassen/ vnd annemen des Bapstes thandt.

Gutt friede woln sie machen/ Vnnd eynigkeit im Landt/ Woln also helffen der Sachen/ Bis ein Concilium werd erkandt/ Ein Interim haben sie dar gestelt/ Die Christen zu vorfüren/ Dem Teuffel dis wol gefelth.“

aus: Eyn schoen new Lied auff das INTERIM gemacht/ troestlich zu singen. Im thon/ Wer in Krieg wil zihen/ Der muss geruestet sein. 1548. (VD16 S 3616), Ai-Aiv, hier: Aii/v-Aiii/r.

### **Informationen**

Das Lied beschreibt die Konsequenzen des Schmalkaldischen Kriegs: das Interim von 1548. Dies ist der Versuch, das reformatorische Geschehen zu beenden und den ursprünglichen Zustand im Alten Reich wiederherzustellen. Dabei reflektiert das Lied auch die Kriegseignisse, spart nicht mit Schuldzuschreibungen und bewertet insgesamt – aus einer konfessionell konnotierten Position heraus – die zeitgenössische Situation. Der Erscheinungsort des Druckes ist vermutlich Magdeburg, der Drucker möglicherweise Christian Rödinger.

Im weiteren Verlauf des Liedes deutet sich eine Widerstandstheologie an: Das „Häuflein“, das sich dem Interim widersetze, fasse seinen Mut durch die Zusage des Gottessohnes, dass dieser den „falschen Schein“ des Interims aufdecken und schließlich die „falsche Sache“ beenden werde. So erscheint am Ende das Bekenntnis folgerichtig, dass die eigene Seele verderben möge, doch das Interim werde trotzdem nicht angenommen, denn „vns“ leuchte Christus, „vom Teuffel seint wider kart.“

**Fragen zur Bearbeitung:**

1. Wer wird als Schuldiger für den Krieg ausgemacht – und welche Motivation wird ihm attestiert?
2. Inwiefern kann bei dem Lied davon gesprochen werden, dass sich hier religiöse und politische Motive verbinden?
3. Welches inhaltliche Ziel hat der Autor des Liedes, wie soll sich das „Alte Reich“ nach seiner Einschätzung gestalten?
4. Gegen wen richtet sich der Widerstand des „kleinen Häufleins“ – und was verrät dies über eine mögliche Widerstandstheologie in der Mitte des 16. Jahrhunderts?
