# Supplementary material
Source: publisher site journal article supplement (https://www.degruyterbrill.com/publication/isbn/9783110454789/downloadAsset/9783110454789_Zusatzmaterial-Grochowina_Reformation_DGS.zip)
Supplement: Supplementary file 3 [file Kapitel 11 Tufer.pdf › Kapitel 11 Tufer.pdf]

## **Zusatzmaterial Kapitel 11:**

### **Quelle:**

Auszug aus: Warhafftiger bericht der wunderbarlichen handlung (1535)

„Vnd wiewol nu aller meniglich kundt vnd offenbar/ das die Teuffer zu Münster ynn Westualen einen könig vnter yhnen auffgeworffen/ welcher Johann von Leiden ein Schneider etc. Den haben sie gekrönt mit einer guldenen und seer köstbarlichen Cronen vnd yhn zu stundt yhren yrdischen herrn vnnd König der gantzen welt erkant vnd angenommen/ auch yhm yn allen dingen vnderthenig willig vnnd gerhorsam gewest mit vbergeben all yhr hab vnd güter etc. vnnd als sie aber samlich vngehört wunderbarlich regiment ein zeit lang angetrieben auch die stadt Münster der massen befestiget das man yhnen wider mit schiessen oder mit stürmen keinen abbruch hat mögen thun/ da vor sich mancher furst vnnd Herr versucht.

Do nun aber das volck vor der stadt teglich grossen schaden von ynen entpfing/ vnd fürsten herren vermerckten das man yhnen keinen abbruch thun möchte ynn keinen weg/ anders dann aushungren/ da ward der Bischoff von Münster sampt andern Fürsten vnnd herren etc. retig vnd schlugen sieben plockheuser zu negst für de stadt in jhar vnnd tag mitt knechten wol besetzt. [...]

Item nach dem Johan von Leyden der schneider/ ein könig der Tauffer zu Münster etc. welcher von allen wiedertauffern/ ein König von neuen Hierusalem vnnd der gantzen welt genant/ erstlich nach eröberung der Stadt zu Münster gefangen wurden yhm vnd Knöppertölling seinem gesellen/ zwey eyszne halsbant geschmid/ auff beyden seyten mit lagen stricken/ die wurden yhnen auff den dritten tag nach yrer gefengnus vmb yre hels geschlossen wurden also zwischen den reysigen/ wie die hund/ drei meil von Münster geführt ynn ein stedtlein/ Eyberg genandt/ vnd nachfolgends/ als der hauff zu Münster auff brach/ wurden sie geführt ynn ein Schlos genant Dülmen/ auch drey meilen von dann/ da vil knecht yren halsbanden für die pforten/ den König vnnd Knöppertölling sein leuten ampt das sie die knecht noch eins sehen möchten etc. auff dem selbigen Schlos kam der Bischoff von Münster erstmals zu dem König und Knöppertölling/ vnn so bald der bischof den könig ansach/ sprach er zu yhm/ ey du böswicht/ wie hastu mich und meine armen leuth verterbt/ do antwort yhm der König trötzlich/ vnn dutzet sein fürstlich gnad vnd sprach. Pfaff/ ich hab dich nit ameit verderbt/ ich hab dir ein feste stadt gelibert, die für allen gewalt ist hab ich verterbt so wil ich dich wieder reich machen/ so fere du mir volgen milt. Hat der bischoff gefragt/ ynn was gestalt er yhn reich machen künd/ do hat er wider den bischoff

gesagt. Er wüste wo das er yhn ein schmehen tod an thun würde/ er solle yhm vnd Knöppterölling seinem gesellen ein eysen korb lassen schmiden/ vnd solle den mit leder vberziehen/ vnd sie zwen dar in setzen/ vnd sie lassen durch das land füren/ vnd wer sie begert zu sehen/ der soll yhm ein weispfennig lassen geben/ so wird er mehr geltz kriegen/ dann er verkiegt hab vnd der stift von Münster wird sey etc. Also ist der bischoff von yhn weg geschieden.“

aus: N.N.: Warhafftiger bericht der wunderbarlichen handlung, der Tauffer zu Münster ynn Westualen, wie sich alle sachen nach eröberung der Stadt, vnd ynn der eröberung zu getragen, auch wie alle handlung yhr entschafft genommen etc. Erfurt 1535. (VD16 W 663), Ai/v-Biv/v, hier: Aii/v-Biii/v.

### **Informationen**

Das Täuferreich von Münster hat die Zeitgenossen sehr interessiert. Zahlreiche Berichte kursierten anschließend; manche wollten das „Wahrhaftige“ der Ereignisse betonen, denn ein solcher Anspruch versprach eine breite Leserschaft, die unbedingt wissen wollte, wie es „wirklich“ gewesen ist. Andere erklärten, sie basierten auf Augenzeugenberichten, wiederum andere verstiegen sich fast ausschließlich in Bewertungen und konfessionelle Polemiken. All diesen Berichten ist gemeinsam, dass sie die Ereignisse von Münster zugleich als faszinierend und als erschreckend darstellten, hatte sich hier doch eine Zuspitzung des reformatorischen Geschehens gezeigt, wie es bis dato undenkbar erschienen ist.

All dies verweist darauf, dass das Täuferreich eine Zäsur innerhalb des reformatorischen Geschehens darstellt. Deutlich wird dies nicht zuletzt an Martin Luther, der nicht allein die Ereignisse von Münster scharf kritisiert, sondern fortan auch sämtliche Täufer unter den Verdacht gestellt hat, mit einem solchen „Münsterischen Regiment“ auch weiterhin „schwanger“ zu gehen. Dies war für ihn ein Grund, sich deutlich für die Verfolgung der Täufer auszusprechen.

### **Fragen zur Bearbeitung:**

1. Welche Position des Autors gegenüber den Täuferreich ist im Text zu erkennen? Woran lässt sich diese Position festmachen?
2. Wie ist das Gespräch zwischen Jan van Leiden und dem Bischof zu bewerten? Welchen Zweck erfüllt dies, was sagt es über den Bischof, was über den Täuferkönig aus?
3. Um das Täuferkönigreich zu beenden, haben der katholische Fürstbischof Franz von Waldeck und der reformatorisch gesinnte Philipp von Hessen zusammengearbeitet. Welche Motivation deutet sich dafür im Text an?
