# Supplementary material
Source: publisher site journal article supplement (https://www.degruyterbrill.com/publication/isbn/9783110454789/downloadAsset/9783110454789_Zusatzmaterial-Grochowina_Reformation_DGS.zip)
Supplement: Supplementary file 4 [file Kapitel 12 Mrtyrer.pdf › Kapitel 12 Mrtyrer.pdf]

## Zusatzmaterial Kapitel 12:

### Quelle:

Auszug aus: Bekenntnis der Elisabeth von Leeuwarden (1549).

DEn vyfthienden Januarij, in het Jaer M.CCCCCXLIX. Te reeckenen het beghinsel des Jaers van nieu Jaers dach af, doen wert Elisabeth gheuangen. Ende doen de ghene die haer vanghen soudent int huys quamen (te weten, daer sy woonde) so vonden sy daer een latijns Testament. Ende doen sy Elisabeth hadden, seyden sy: Wy hebben, wy hebben de rechte man, wy hebben nv de Leerarisse, ende seyden: Waer is v Man, die Leeraer Menno Simons, &c. Ende sy brachtense op dat Raethuys. Ende des anderen daechs namen haer twee Witkouels tusschen haer beyden, ende brachtense op dat Blockhuys. Doen worde sy voor den Raedt ghestelt, ende sy vraechden haer by haren Eedt, oft sy oock eenen man hadde. Elisabeth antwoordde: Ons en behoort niet te sweeren, maer onse woorden sullen zijn: Jae, iae, ende Neen, neen, Ick en hebbe gheen Man. De Heeren: Wy segghen, dat ghi een Leerarisse zijt, die veel Lieden verleydt, ende wy hebbent wel van v hooren segghen, Wy willen weten, wie dat v vrienden zijn. Elisabeth: Mijn Godt heeft my gheboden, dat ick lief hebben sal mijnen Heere ende mijnen Godt, daer toe mijn Ouders eeren, daerom en wil ick v niet segghen, wie mijn Ouders zijn, want dat ick om Christus Name lijde, dat is mijn Vrienden oneere. De Heeren: Hier mede willen wy v nv betijen laten, maer wy willen weten, wat Lieden dat ghy gheleert hebt. Elisabeth: Och neen, mijn Heeren, laet my doch met vreden van desen, ende vraecht my nae mijn Ghelooue, dat wil ick v soo gheerne segghen. De Heeren: Wij sullent v wel soo banghe maecken, dat ghijt ons wel segghen sult. Elisabeth: Ick verhope door de ghenade van Godt, dat hy mijn tonghe bewaren sal, dat ick gheen Verradersse en worde, ende mijnen Broeder niet en leure in den doot. De Heeren: Wat Lieden waren daer by, doen ghy gedoopt worde? Elisabeth: Christus sprack: Vraecht den ghenen die daer by waren, oft diet ghehoort hebben. De Heeren: Nv mercken wy, dat ghy een Leerarisse zijt, want ghy v Christo ghelijck maken wilt. Elisabeth: Neen mijn Heeren, dat waer verre van my, want ick my niet hooger en achte, dan dat wtvaechsel, dat daer wt gheuaecht wort wt dat Huys des Heeren. De Heeren: Wat ist dan dat ghi hout vant Huys Godts? Hout ghy onse Kercke niet voor het Huys Godts? Elisabeth: Neen ic mijn Heeren, want daer staet gheschreuen: Ghy zijt den Tempel van den leuendigen Godt, ghelijck als Godt spreckt: Ick wil in haer woonen ende wandelen. De Heeren: Wat hout ghy van onse Misse? Elisabeth: Mijn Heeren, van uwe Misse en houde ic niet, maer al wat met Godts Woort ouer een coemt daer houde ic veel van. De Heeren: Wat hout ghy van dat hoochweerdighe heylighe Sacrament?

Elisabeth: Ick en hebbe mijn leuen niet ghelesen in de heyliche Schrift van een heylich Sacrament, maer wel van het Auontmael des Heeren (Sy verhaelde ooc de Schrift die daer op liep.) De Heeren: Swijcht, want de Duyuel spreekt wt uwen mondt. Elisabeth: Jae mijn Heeren, dit is een cleyne sake; want de knecht en is niet beter dan zijn Heere. De Heeren: Ghy spreekt met eenen hoochmoedighen gheest. Elisabeth: Neen mijn Heeren, ick spreek met eenen vrijen moet. De Heeren: Wat sprack de Heere, doen hy zijnen Discipulen dat Auontmael ghaf? Elisabeth: Wat ghaf hy haer, vleesch oft broot? De Heeren: Hy ghaf haer broot. Elisabeth: Bleef de Heere dan daer niet sitten? Wie woude dan des Heeren vleesch eten? De Heeren: Wat hout ghy vanden kinderdoop, dat ghy v weder hebt laten doopen? Elisabeth: Neen mijn Heeren, ick en hebbe my niet weder laten doopen, ick heb my eenmael laten doopen op mijn ghelooue, want daer gheschreuen staet, dat den gheloouighen den doop toecoemt. De Heeren: Sijn onse kinderen dan verdoemt, om dat sy ghedoopt worden? Elisabeth: Neen mijn Heeren, dat sy verre van my, dat ic de kinderen ordeelen soude. De Heeren: Soect ghy v salicheyt niet inden doop? Elisabeth: Neen mijn Heeren, al dat water van de zee en mocht my niet salich maecken, maer de salicheyt staet in Christo. Ende hi heeft my gheboden, Godt mijnen Heere lief te hebben boven alle dinck, ende mijnen Naesten als my seluen. [...]

Hier na is de Sentencie ouer Elisabeth ghEGAEN, Int Jaer 1549. Den 27. dach van de Meert, ende is veroordeelt ter doot, ghedrenct te worden in eenen sack, ende heeft also haer lichaem Gode op geoffert.“

aus: Samuel Cramer (Hg.): Het Offer des Heeren (de oudste verzameling doopsgezinde martelaarsbrieven en offerliederen). (Bibliotheca Reformatrica Neerlandica, 2). Den Haag 1904, 91-97, hier: 91-95.

## Informationen

Täuferische Martyrologien bilden einerseits das gesamte Spektrum der täuferischen Bewegung ab, andererseits verschließen sie sich aber nicht der zeitgenössisch bedingten Geschlechterhierarchie. Das bedeutet, dass es gerade auch in „Het offer des Herren“ insbesondere den Männern vorbehalten ist, theologische Diskurse mit denjenigen zu führen, die sie verhören, oder Ermahnungen an die Gemeinde zu schicken, zu denen sie gehören.

Das Bekenntnis von Elisabeth aus Leeuwarden ist hier eine Ausnahme – und auch die Verhörenden nähren den Verdacht, es hier mit einer besonderen Frau zu tun zu haben, denn ansonsten würden sie nicht nach Elisabeths möglicher Beziehung zu Menno Simons fragen und sie würden auch nicht darauf pochen, dass Elisabeth eine „Lehrerin“ in der täuferischen Bewegung

sein könnte. Und auch die Tatsache, dass mehrere theologische Themen adressiert (Kindertaufe, Kirche, Abendmahl) und durchaus intensiver abgehandelt werden, verweist auf die Besonderheit dieser Frau.

„Het offer des Herren“ ist das erste täuferische Martyrologium: 1562 erschienen, erlebte es bis 1599 zahlreiche Auflagen. Samuel Cramer hat die Ausgabe von 1570 herausgegeben, die sich dadurch auszeichnet, dass die Texte von einem „Liedbuch“ ergänzt werden. Dies sorgte allerdings nicht dafür, dass die Lieder, die unmittelbar an die Bekenntnisse angehängt wurden, nun im Liedbuch unterkamen, vielmehr ergänzt das Buch den Gesamttext.

### **Fragen zur Bearbeitung:**

1. Wie argumentiert Elisabeth im Verhör? Welche Punkte unterstreicht sie? Welches Interesse steht dahinter?
2. Passt sich Elisabeth mit ihrer Argumentation und ihrem Umgang mit den ihr gestellten Fragen in die zeitgenössische Geschlechterhierarchie ein?
3. Bekenntnisse von Märtyrern und Märtyrerinnen sollten all jene in der täuferischen Bewegung ermutigen, die sich ebenfalls der Verfolgung ausgesetzt sahen. Welche Eigenschaften von Glaubenszeugen betont Elisabeth, wo liegt also für die Lesenden der pädagogische Mehrwert ihres Bekenntnisses?
4. Welche besondere Quellenproblematik stellt sich beim Umgang mit Martyrologien? Sind die Bekenntnisse und Briefe darin als Selbstzeugnisse zu bewerten? Wie ist dies nachzuweisen? Oder müssen sie geradezu fiktiv sein, um erbauen und stärken zu können?
