# Supplementary material
Source: publisher site journal article supplement (https://www.degruyterbrill.com/publication/isbn/9783110454789/downloadAsset/9783110454789_Zusatzmaterial-Grochowina_Reformation_DGS.zip)
Supplement: Supplementary file 5 [file Kapitel 13 Interim-Magedeburg.pdf › Kapitel 13 Interim-Magedeburg.pdf]

## **Zusatzmaterial Kapitel 13:**

### **Quelle:**

Auszug aus: Johann Bauernschmidt: Interim. Ein neuwes und mit heylicher Schrifft wolgegrüntes Lied (ca. 1549).

„Recht listig greiffts der Teuffel an [= das Evangelium] / meint vns zu überreden. Ein pflug vnn auch ein Ackerman/ Ja neben disen beiden. Ein Weybischoff der heist nicht HEintz/ mich dunckt der Esel sey vonn Meyntz/ haben ein buch gespeyet/ dz sei vmaledeyet/ sampt den die es haben gwihet.

INTERIM/ gar schön ist sin nam/ scheint forn gantz Englischer wise. Hinckt mitten vnnd ist hinden lam/ ja wers durch list mit fleise. Dem möchte erkalten mut vnd hertz/ sy halten Gottes wort für schertz/ ja wölln in Gottes sachen/ all ding vil besser machen/ Gott wird ein mal auffwachen.

Ach Gott mir zittert jetzt min hertz/ das ich von dem soll schryben. Der vormals auch on allen schertz/ dein Göttlichs wort halff treiben. Vnd war by vns der letzte nicht/ yetzundt er selbst/ din wort anficht/ thut wider dich außspeihen/ nach Luthers propheceien/ es wirt ihm nicht gedeien.

Christus du warer Gottes Son/ laß vns von dir nit weichen. Erhalt beym Euangelion/ vnns armen sampt den reychen. Gib uns dein Göttlich wort ins hertz/ gleich wie du sprichst sonder schertz/ wol dem der mich bekennet/ der sit von mir genennet/ ob man ihn glich verbrennet.

Verflucht sey ewiglich der man/ der Gott thut widersprechen. Die sach geh vns mit nichten an/ Gott wirt sein ehr wol rechen. Ein jeder sehe allein für sich/ vnd nicht auf andre das bitt ich/ ein jeder müß selbst geben/ rechnung von lehr und leben/ dem der ob vns thut schweben.

Solchs bedenck ein jeder Christ/ im abgrund sines hertzen. Ob etwan käm die zeyt und frist/ das wir mit peyn vnn schmerzen/ nach wol verdienter Gottes straff/ geschlachtet würden als die Schaff/ so laß den Sathan scharren/ Gott wird dich wol bewaren.“

aus: Johann Bauernschmidt: Interim. Ein neuwes und mit heylicher Schrifft wolgegrüntes Lied wider das schöne Heuchelische vnd gladstreichende Ketzlin genannt Interim. [Magdeburg ca. 1549], unpag., hier: Bl. 2r-3r.

## **Informationen**

Kaiser Karl V. hatte im Juli 1547 die Reichsacht über die Stadt Magdeburg verhängt. Mehrere Gründe werden ihn dazu bewogen haben, die Stadt in dieser Weise des Aufruhrs und des Ungehorsams zu bezichtigen: Nicht allein die Tatsache, dass Magdeburg bereits 1524 reformatorische Neuerungen eingeführt hatte, ist hier zu nennen, sondern auch das Engagement Magdeburgs im Schmalkaldischen Krieg (1546/7). Hier widerstanden die Truppen eisern der Belagerung durch die kaiserlichen Verbände – und fanden zudem noch Zeit, immer wieder in den norddeutschen Raum vorzustoßen und dort ebenfalls belagerten Städten zu helfen oder sich Güter aus der Umgebung anzueignen, die vormals zum Domkapitel gehörten.

Vor diesem Hintergrund verwundert es nicht, dass in Magdeburg ein Großteil der Schriften entstanden ist, die sich gegen das Interim aussprachen und dabei auch – ebenso wie in dem Lied – nicht vor populistischen Zuspitzungen zurückschreckten. In den gut 450 Magdeburger Drucken (zwischen 1548 und 1552) erschien die Stadt dann als der Ort, an dem das Erbe des Luthertums nicht nur bewahrt, sondern auch mit Leib und Leben verteidigt wurde. Zudem atmen die zahlreichen Schriften eine endzeitliche Stimmung: Das Gericht Gottes stehe bevor, die Sünden würden gestraft werden, aber letztlich werde Gott doch all diejenigen bewahren, die ihm nicht von der Fahne gegangen seien.

Zu dem Kreis, der für diese Publikationen verantwortlich war, gehörte auch Nikolaus von Amsdorf (1483–1565), der nicht nur 1524 die Reformation in der Stadt eingeführt hatte, sondern auch nach Magdeburg zurückgekehrt ist, nachdem er 1547 aus Naumburg vertrieben worden ist. Doch auch Erasmus Alberus ist hier zu nennen, der die Flugschrift verfasst hat, die am Beginn von Kapitel 13 zu finden ist.

## **Fragen zur Bearbeitung:**

1. Welche Personen werden für das Interim verantwortlich gemacht? Wie wird es insgesamt bewertet?
2. Welche Rolle wird dem eigenen Verhalten, dem eigenen Glauben dabei zugeschrieben?
3. Wo leuchten endzeitliche Zuschreibungen auf? Woraus erklärt sich ihre Dringlichkeit?
4. In den Schriften stilisiert sich Magdeburg zum letzten wahren Hort des Luthertums. Was war für die lutherische Lehre am Interim so bedrohlich, dass die Stadt es ebenso wie Bremen verweigerte und dass andere Territorien nach einer Kompromisslösung suchten?
