# Supplementary material
Source: publisher site journal article supplement (https://www.degruyterbrill.com/publication/isbn/9783110454789/downloadAsset/9783110454789_Zusatzmaterial-Grochowina_Reformation_DGS.zip)
Supplement: Supplementary file 6 [file Kapitel 14 Jubilen.pdf › Kapitel 14 Jubilen.pdf]

## **Zusatzmaterial Kapitel 14:**

### **Quelle:**

Auszug aus: Erinnerungsblatt zum 400jährigen Reformations-Jubiläum (1917).

„Liebe Glaubensgenossen!

Lang und schwer ist der große Krieg, der uns aufgezwungen ward. Uns gelüstet nicht nach lauten oder glänzenden Festen. Stahlhart müssen wir sein. Gerade deswegen dürfen wir nicht vergessen, daß das Jahr 1917 für alle Evangelischen und ganz besonders für die deutschen Evangelischen ein Gedächtnisjahr von ganz besonderer Art ist. Vier Jahrhunderte sind verflossen, seitdem die Reformation, die längst zuvor ersehnte, von vielen gewollte Erneuerung der christlichen Kirche mit Luthers Thesenanschlag an die Schloßkirchentüre zu Wittenberg anhub. Wie damals muß heute unsre trutzige Losung sein: ‚Mit Gott durch Kampf zum Sieg!‘ Was hat die Reformation geschenkt? Sie hat das Evangelium, die Frohbotschaft von Gottes freier Gnade in Christo wieder auf den Leuchter gestellt, daß es kraftvoll leuchte all denen, die voll Vertrauens es ergreifen. [...] Sie hat das Wort des Heilandes wieder zur Geltung gebracht: ‚Einer ist Meister, Christus, ihr aber seid alle Brüder‘ (Matth. 23,8) und ist für Glaubens-, Gewissens-, Forschungsfreiheit kräftig eingetreten. [...] Sie hat dem Staat mit seiner Obrigkeit als gottgewollter Ordnung zur Anerkennung verholfen und die ehrliche Arbeit jedes Berufes und Standes geweiht [...]. Sie hat das evangelische Pfarrhaus gegründet und die Ehe geheiligt [...]. Sie hat durch ihren größten Helden, unsern grunddeutschen Luther, die deutsche Bibel, das deutsche Gesangbuch, den deutschen Katechismus geschaffen und darin unserem ganzen Volke eine einheitliche deutsche Sprache beschert.

Sie hat neben der gelehrten Bildung die deutsche Volksschule gefördert und mächtig anregend gewirkt auf allen Gebieten edler menschlicher Betätigung (insbesondere der Kunst und der Wissenschaft).

Ja, die Reformation hat reichsten, unvergänglichen Segen gestiftet und eine neue Zeit mir heraufgeführt; Deutschlands größte Männer sind ihre Söhne. ‚Lobe den Herrn, meine Seele, und vergiß nicht, was er dir Gutes getan hat‘! [sic!] (Psalm 103, 2). Amen.“

aus: Erinnerungsblatt zum 400-jährigen Reformationsjubiläum 1517-1917, Laumersheim, Pfalz, im 32. Kriegsmonat [1917], in: Zentralarchiv der Evangelischen Kirche der Pfalz Abt. 173, Nr. 493. Vollständige Flugschrift inkl. Bild ist mit erklärendem Text abrufbar unter:

[https://www.zentralarchiv-speyer.de/fileadmin/user\\_upload/1917Reformationsjubilaeum.pdf](https://www.zentralarchiv-speyer.de/fileadmin/user_upload/1917Reformationsjubilaeum.pdf)  
[16-8-2019].

### **Informationen**

Jedes Reformationsjubiläum erzählt in erster Linie etwas über die Zeit, in der es gefeiert wird. Welche Themen sind gerade virulent? Welche Fragen werden gestellt? Welche Bilder sollen erzeugt werden? Wie soll sich die Erinnerungskultur ausgestalten? Welche Erinnerungspolitik wird hier also betrieben?

Die Feierlichkeiten 1917 sind hier keine Ausnahme, im Gegenteil: Mitten in den Ereignissen des Ersten Weltkrieges ging es darum, Luther als „grunddeutsch“ zu klassifizieren und so ihn und die Nation in den Mittelpunkt zu rücken, die durch Luther erst in ihre volle Freiheit geführt worden sei. Damit werden Luther Werte zugeschrieben, die für 1917 handlungsleitend sein sollten – und die es zugleich ermöglichen sollten, „stahlhart“ durch die gegenwärtige Zeit zu gehen und diese sieghaft zu bestehen.

Diese nationalistische Deutung ist keine Erfindung des 20. Jahrhunderts, schon im Lutherjahr 1883 hat sich mehr als deutlich gezeigt, dass der Eindruck entstehen sollte, Luther hätte „die neue Zeit“ heraufgeführt. Sichtbaren Ausdruck fand diese Verherrlichung um der Nation willen in den zahlreichen Statuen, mit denen Deutschland nun gepflastert wurde und die deutlich erklärten, dass Deutschland der schöpferischen Herrschaftskraft Luthers künftig in keiner Weise nachstehen würde.

Eine solche Deutung ist antagonistisch, denn sie geht davon aus, dass es einen Überlegenheitsanspruch Deutschlands geben müsse, weil die europaweit ausgreifende Reformation mit den Hammerschlägen von Wittenberg begonnen hätte. Insofern war die Kriegsniederlage von 1918 ein beachtlicher Dämpfer dieses Anspruches, wenn dies auch nicht zu einer demütigen Auseinandersetzung mit Welt- und Geschichtsbildern, sondern vielmehr zu einem kaum mehr zu übersteigernden Nationalismus geführt hat, der sich auch und gerade aus dieser antagonistischen Logik gespeist und ihr in vehementer Weise Ausdruck verliehen hat. Nicht zuletzt dies hat den Weg zum nationalsozialistischen Regime mit all seiner Bestialität geebnet.

### **Fragen zur Bearbeitung:**

1. Welche Welt- und Geschichtsbilder leuchten in der Quelle auf? Wie werden Luther und die deutsche Nation in Beziehung gesetzt – und wie wird diese Beziehung gedeutet?
2. Welche Informationen gibt die Quelle über das reformatorische Geschehen? Warum geschieht dies in dieser Weise?

3. Jubiläen erzählen mehr über die Zeit, in der sie gefeiert werden, als über den Gegenstand, um den es geht. Diskutieren Sie die unterschiedlichen Ebenen dieser These und begründen Sie Ihre Zustimmung oder Ablehnung.
