# Supplementary material
Source: publisher site journal article supplement (https://www.degruyterbrill.com/publication/isbn/9783110454789/downloadAsset/9783110454789_Zusatzmaterial-Grochowina_Reformation_DGS.zip)
Supplement: Supplementary file 7 [file Kapitel 2 Bullinger Tufer.pdf › Kapitel 2 Bullinger Tufer.pdf]

## Zusatzmaterial Kapitel 2:

### Quelle:

Auszug aus: Heinrich Bullinger: Von dem unverschampten Fräfel, ergerlichem Verwyrren unnd unwarhafftem Leeren der selbsgesandten Widertöuffern. Zürich 1531.

Frilich ist es waar/ dz der Heyden beklagt habend/ das die menschen also begyrig syed nüwer dingen/ das sy ouch sich selbst frywillig einem yeden verwirrer und schantlichem/ so er anders iitzid mitt glychßnery vn ödem/ doch glattem kläpper/ kan/ ze verführen und berouben darstellend. Und wiewol sölichs an jm selbs/ so man nun menschlich daruon reden wil/ ein sölcher jamer ist/ an dem an ein besunder schühen vnnd grüwel tragen sol: Ist es doch vil kleglicher vnd grüwlicher/ das by vnns Christen ein sölich jamer geschehen sol werden: ja by vns/die wir doch gewüsse und umbschribne/ nit vnentliche/ ja kurtze vnd kundbare gründ/ vnser gloubens vnnd läbens habend/ daruff wir billich blibend vnd vnns nitt liessend von einem yetlichen verworren menschen/hin vnnd wider sülchen. Aber ye doch verdienend sölichs vnser sünd vnnd vnredliche an Gottes wort/ das wir mit gutem hertzen nit annehmend/ vnnd allwägen weiß ich was suchend/ darumb vnns dann unser sinn verkeert vnnd in schad vnnd schand gegeben werdend. [...]

Der geyst/ der da strydet wider die art des geystes/ der sich in Biblischen geschrifften erlüttert hatt/ ist nit vß dem vatter der warheyt/ vß Gott/ sunder vß dem vatter der lügen/ vß dem tüfel. So hatt sich nye kein frommer Christ für sich selbs deß öffentlichen predigens angenommen/ sunder erst/ so er von Gott gesandt oder von den Apostlen [...] erwelt ward. [...]

Nit minder valsche propheten sind ouch die/& die nit one verachtung des crützes Christi/ rendend/ Christus habe nun die erbsünd hingenommen/vnn tägliche verzyhung der sünde dem abschlahend/ der eynest gereyniget wider fallt/ oder die gerechtigkeit vnsern wercken zugebend. [...]

Deren widertouff ist ouch nit vß Gott/ sunder ein nüwe rottung/ wider Christenliche eynigkeit/ vnd ein ernüwerung der kätzereyen/ Nouati/ Auxentii/ vnd Pelagii. Der kindertouff aber ist vß Gott/ hat ye vnd ye syd der zyt der Apostlen/ biß vff vns gewärt/ vnd ist nir erst von Bäpsten erdacht. [...] Darumb sind alle die maasen des Christenlichen volcks/ die unberüfft von Gott/ jr huß verlassend/ vnd sich mit vffrügigem kläpper/ an ander lüten weydennd/ glych wie ouch etwan die münchen mit jr glychßnery gethon habend.“

aus: Heinrich Bullinger: Von dem unverschampten Fräfel, ergerlichem Verwyrren unnd unwarhaftem Leeren der selbgesandten Widertöuffern. Zürich 1531, B/v-Bii/r und VI/r-VII/v. Der vollständige Text findet sich hier: <https://www.e-rara.ch/zuz/doi/10.3931/e-rara-3030> [19-8-2019].

### **Information:**

Heinrich Bullinger (1504–1575) wurde 1531 der Nachfolger Ulrich Zwinglis in Zürich, nachdem dieser im Zweiten Kappelerkrieg gefallen war. Zuvor war der studierte Theologe als Flüchtling in die Stadt gekommen, weil Bremgarten (sein Heimatort, in dem er auch Prediger war) nach 1531 wieder zum katholischen Glauben übergehen musste. In diesem Jahr ist auch seine Schrift über die Täufer entstanden.

Bullinger blieb bis zu seinem Tod in Zürich. In dieser Zeit hat er mit Johannes Calvin eine Einigung über das Abendmahlsverständnis erlangt (Consensus Tigurinus, 26 Artikel, 1549). Zudem hat er das Zweite Helvetische Bekenntnis abgefasst, das zunächst sein persönliches Glaubensbekenntnis war (1561), dann vom Zürcher Rat als geistliches Testament verstanden und angenommen (1564) und schließlich vom Kurfürst Friedrich von der Pfalz genutzt wurde (1564), um seinen eigenen Übertritt zur reformierten Konfession zu rechtfertigen. Schließlich wurde dieses Bekenntnis mit seinen 30 Artikeln abgesehen von Basel in allen reformierten Gemeinden der Schweiz angenommen. Damit hat sich der Einigungsprozess fortgesetzt, der bereits mit dem Ersten Helvetischen Bekenntnis (1536) begonnen hatte. Analog zur Kritik Bullingers an den Täufern wird im Zweiten Helvetischen Bekenntnis u. a. betont, dass das Wort Gottes allein von denjenigen verkündet werden dürfe, die dafür rechtmäßig berufen seien.

### **Fragen zur Bearbeitung:**

1. Welche Vorwürfe erhebt Heinrich Bullinger gegenüber den Täufern – und wie argumentiert er? Ist es eine primär religiös konnotierte Argumentation oder spielen auch politische Zuschreibungskategorien eine Rolle?
2. Wendet sich Bullinger in der Schrift allein gegen die Täufer?
3. Die Schrift über die Täufer ist von 1531. Wie passt sie sich in den zeitgenössischen Horizont und die Entwicklungen der Schweizer Reformation ein? Und welche Perspektive ergibt sich daraus?
