# Supplementary material
Source: publisher site journal article supplement (https://www.degruyterbrill.com/publication/isbn/9783110454789/downloadAsset/9783110454789_Zusatzmaterial-Grochowina_Reformation_DGS.zip)
Supplement: Supplementary file 8 [file Kapitel 3 Luther Juden.pdf › Kapitel 3 Luther Juden.pdf]

### **Zusatzmaterial Kapitel 3:**

#### **Quelle 1:**

Auszug aus: Martin Luther: Daß Jesus Christus ein geborner Jude sei (1523).

„Ob aber die Juden wurd ergern, das wyr unsern Jhesum eyn menschen und doch waren Gott bekennen, wollen wyr mit der zeyt auch krefftiglich aus der schrift bessern. Aber es ist tzu anfang tzu hart, laß sie tzu vor milch saugen und auffs erst dißen menschen Jhesum fur den rechten Messiah erkennen. Darnach sollen sie weyn trincken und auch lernen, wie er warhafftiger Gott sey. Denn sie sind tzu tieff und tzu lange verfurt, das man mus seuberlich mit yhn umbgehen, als denen es ist alltzu seer eyngewendet, das Gott nicht muge mensch seyn.

Darumb were meyn bitt und rad, das man seuberlich mit yhn umbgieng und aus der schrift sie unterrichtet, so mochten yhr ettliche herbey komen. Aber nu wyr sie nur mit gewallt treyben und gehen mit lügen teydingen umb, geben yhn schuld, sie müssen Christen blutt haben, das sie nicht stincken, und weys nicht wes des narren wercks mehr ist, das man sie gleich fur hunde hellt, Was sollten wyr guttis an yhn schaffen? Item das man yhn verbeut, untter uns tzu erbeyten, hantieren und andere menschliche gemeynschafft tzu haben, da mit man sie tzu wuchern treybt, wie sollt sie das bessern?

Will man yhn helffen, so mus man nicht des Bapsts, sonder Christlicher liebe gesetz an yhn uben und sie freuntlich annehmen, mit lassen werben und erbeyten, da mit sie ursach und raum gewynnen, bey und umb uns tzu seyn, unser Christlich lere und leben tzu horen und sehen. Ob ettliche hallstarrig sind, was ligt dran? sind wyr doch auch nicht alle gute Christen. Hie will ichs dis mall lassen bleyben, bis ich sehe, was ich gewirckt habe. Gott gebe uns allen seyne gnade.

aus: Martin Luther: Daß Jesus Christus ein geborner Jude sei, in: WA 11, 314-336, hier: 336.

#### **Quelle 2:**

Auszug aus: Martin Luther: Von den Juden und ihren Lügen (1543).

„Was wollen wir Christen nu thun mit diesem verworffen, verdampften Volck der Juden? [...] Ich will meinen trewen rat geben.

Erstlich, das man jre Synagoga oder Schule mit feur anstecke und, was nicht verbrennen wil, mit erden uber heuffe und beschütte, das kein Mensch ein stein oder schlacke davon sehe ewiglich. Und solchs sol man thun, unserm Herrn und der Christenheit zu ehren damit Gott sehe,

das wir Christen seien und solch öffentlich liegen, fluchen und lestern seines Sones und seiner Christen wissentlich nicht geduldet noch gewilliget haben. [...]

Zum andern, das man auch jre Heuser des gleichen zerbreche und zerstöre, Denn sie treiben eben dasselbige drinnen, das sie in jren Schulen treiben. Dafur mag man sie etwa unter ein Dach oder Stal thun wie die Zigeuner, auff das sie wissen, sie seien nicht Herrn in unserm Lande, wie sie rhümen, Sondern im Elend und gefangen, wie sie on unterlas fur Gott uber uns zeter schreien und klagen.

Zum dritten, das man jnen neme alle jre Betbüchlin und Thalmudisten, darin solche Abgötterey, lügen, fluch und lesterung geleret wird.

Zum vierden, das man jren Rabinen bey leib und leben verbiete, hinfurt zu leren, Denn solch Ampt haben sie mit allem recht verloren. [...]

Zum fünfften, das man den Juden das Gleid und Straffe gantz und gar auffhebe, Denn sie haben nichts auff dem Lande zu schaffen. [...] Denn jr solt und künd sie auch nicht schützen, jr wolt denn fur Gott alles ihres gewels teilhaftig sein. [...]

Zum sechsten, das man jnen den Wucher verbiete und neme jnen alle barschafft und Kleinot an silber und Gold, und lege es beseit zu verwaren. Und ist dis die ursache: Alles, was sie haben (wie droben gesagt), haben sie uns gestolen und geraubt durch jren Wucher, weil sie sonst kein ander narung haben. [...]

Zum siebenden, das man den jungen starcken Jüden und Jüdin in die hand hebe slegel, axt, karst, spatzen, rocken, spindel, und lasse sie jr brot verdienen im schweis der nasen, wie Adams kindern auffgelegt ist.“

aus: Martin Luther: Von den Juden und ihren Lügen, in: WA 53, 412-552, hier: 522-526.

### **Information:**

Die zwei Schriften Luthers zum Judentum in seiner Zeit weisen signifikante Unterschiede auf. 1523 war Luther noch von Euphorie und der Vorstellung erfasst, dass Juden verstärkt zum Christentum konvertieren würden. Daran hatte nicht zuletzt der Rabbiner Jakob Gopher Anteil, der im Dezember 1519 konvertiert und dessen Sohn – in Anwesenheit Luthers – im Frühjahr 1523 getauft worden ist.

Doch 1543 war diese Euphorie abgeklungen, denn – anders als von Luther erhofft – ist es nicht zu zahlreichen Konversionen gekommen. Als sich dann auch noch die kursächsische Judenpolitik verschärfte, indem etwa den aus Böhmen vertriebenen Juden untersagt wurde, auf ihrer Flucht durch Sachsen zu ziehen (Durchzugsverbot von 1543, nachdem 1541/2 der bedingte

Durchzug noch erlaubt gewesen ist), war es für Luther nur noch ein kleiner Schritt zu seiner Schrift von 1543, deren Richtung sich bereits 1538 angedeutet hat.

Die Auseinandersetzung mit Luthers Position gegenüber dem Judentum dauert bis in die Gegenwart an. Neben dem jüdisch-christlichen Dialog verweisen verschiedene Synodalbeschlüsse und Positionierungen der Evangelischen Kirche Deutschlands (EKD) darauf, wie schwer sich die evangelische Kirche im Lauf der Geschichte mit diesem Erbe getan hat – und welche Konsequenzen daraus für prekäre Fragen der Gegenwart (etwa zur Judenmission) gezogen wurden. Ein Überblick zu Beschlüssen, Erklärungen und Änderungen von Kirchenordnungen (seit 1980) findet sich hier: <http://www.evangelische-worte-christen-juden.imdialog.org/>

### **Fragen zur Bearbeitung:**

1. Welche Unterschiede lassen sich in Luthers Haltung von 1523 und 1543 erkennen? Welche Faktoren waren hierfür entscheidend?
2. Wie ist das Erbe zu beschreiben, dass sich aus Luthers Positionen ergibt – und wie hat sich dies in den nachfolgenden Zeiten konkretisiert? Welche Folgen und Verantwortlichkeiten ergeben sich aus diesem Erbe für die Gegenwart?
3. Im Zugehen auf das Reformationsgedenken 2017 wurde die Frage diskutiert, ob es einen direkten Weg von Luther zu Hitler geben würde. Diskutieren Sie diese These. Als Grundlage hierfür kann der Artikel „Luthers Abweg“ von Klaus Holz (Generalsekretär der Evangelischen Akademien in Deutschland) gelten, der am 24. November 2016 in der ZEIT erschienen ist. Der Artikel findet sich hier: <https://www.zeit.de/2016/49/reformation-martin-luther-kirche-antisemitismus> [15-8-2016]
