# Supplementary material
Source: publisher site journal article supplement (https://www.degruyterbrill.com/publication/isbn/9783110454789/downloadAsset/9783110454789_Zusatzmaterial-Grochowina_Reformation_DGS.zip)
Supplement: Supplementary file 9 [file Kapitel 4 Gerechtigkeit und Glaube.pdf › Kapitel 4 Gerechtigkeit und Glaube.pdf]

## **Zusatzmaterial Kapitel 4:**

### **Quelle:**

Auszug aus: Augustinus: De spiritu et littera / Der Geist und der Buchstabe.

„IX, 15: Die bekannte menschliche Anmaßung, die Gottes Gerechtigkeit erkennt und ihre eigene aufzurichten sucht (vgl. Röm 10, 3), könnte an dieser Stelle vielleicht sagen, der Apostel habe mit Recht geschrieben: ‚Denn durch Gesetzeswerke wird kein Mensch gerechtfertigt.‘ (Röm 3, 20); das Gesetz zeigt nämlich nur, was zu tun oder zu meiden ist, damit der Wille die Weisung des Gesetzes erfülle und so der Mensch nicht durch das Gebot des Gesetzes, sondern durch seine freie Entscheidung gerechtfertigt werde. Richte jedoch, o Mensch, deine Aufmerksamkeit auf das Folgende: ‚Jetzt aber‘, fährt er fort, ‚is unabhängig vom Gesetz die Gerechtigkeit Gottes offenbar geworden, bezeugt durch das Gesetz und die Propheten‘ (Röm 3, 21). Tönt [dieses Wort] nicht laut genug [in den Ohren] tauber Menschen? ‚Die Gerechtigkeit Gottes‘, sagt er, ‚ist offenbar geworden.‘ Die verleugnet eben, wer seine eigene [Gerechtigkeit] aufzurichten sucht und sich dieser nicht unterwerfen will (vgl. Röm 10,3). [Der Apostel] schreibt: ‚Die Gerechtigkeit Gottes ist offenbar geworden‘, hat aber nicht den Ausdruck gebraucht: Die Gerechtigkeit des Menschen oder die Gerechtigkeit des eigenen Willens – nein, die Gerechtigkeit Gottes; [damit meint er freilich nicht die Gerechtigkeit], durch die Gott selbst gerecht ist, sondern die, mit der er den Menschen bekleidet, wenn er den Sünder rechtfertigt. Diese wird bezeugt durch das Gesetz und die Propheten; denn beide legen dafür Zeugnis ab: das Gesetz durch Gebot und Drohung sowie dadurch, daß Gottes es niemanden rechtfertigt und so zur Genüge verrät, daß Gottes Gnadengeschenk den Menschen durch die Unterstützung des Geistes rechtfertigt; die Propheten aber, weil Christi Ankunft ihre Weissagung erfüllte. Daher fügt er anschließend hinzu: ‚Die Gerechtigkeit Gottes auf Grund des Glaubens Jesu Christi‘ (Röm 3, 22); das will nämlich besagen: auf Grund eines Glaubens, durch den man an Christus glaubt. So wie aber dies der Glaube Christi genannt worden ist, nicht [als ob damit] Christi eigener Glaube [gemeint sei], so ziel jene Bezeichnung ‚Gerechtigkeit Gottes‘ nicht auf Gottes eigene Gerechtigkeit. Beides nämlich [Gerechtigkeit und Glaube] ist uns zu eigen; aber deswegen heißt es Gottes und Christi Sache, weil es uns durch seine Freigebigkeit geschenkt wird. Demnach ist also die Gerechtigkeit Gottes unabhängig vom Gesetz, handelt es sich um jene, die Gott durch den Geist der Gnade dem Glaubenden mitteilt ohne die Hilfe des Gesetzes, d. h. ohne vom Gesetz Hilfe erfahren zu haben; denn Gott hat nun einmal dem Menschen durch das Gesetz

seine Schwäche sichtbar gemacht, damit er über den Glauben zu seiner Barmherzigkeit Zuflucht nehme und Heilung finde. [...]

Demnach gilt: ‚Die Gerechtigkeit Gottes auf Grund des Glaubens an Jesus Christus, [und zwar] für alle, die [an ihn] glauben. Es gibt da keinen Unterschied. Denn alle haben gesündigt und ermangeln des Ruhmes Gottes‘ (Röm 3, 22f), nicht des eigenen Ruhmes. Denn was haben sie, das sie nicht empfangen hätten?“

aus: Augustinus: De spiritu et littera/ Der Geist und der Buchstabe. Anlaß der Schrift: Des Marcellinus Bedenken gegen Augustins Lehre von der allgemeinen Sündhaftigkeit der Menschen, in: Augustinus-Institut der deutschen Augustiner (Hg.): Aurelius Augustinus. Schriften gegen die Pelagianer, lateinisch-deutsch, Bd. 1: Strafe und Nachlassung der Sünden. Der Geist und der Buchstabe. Natur und Gnade, Würzburg 1971, 302-435, hier: 324-327.

### **Information**

Augustinus‘ Schrift „De spiritu et littera“ ist wohl in Martin Luthers Vorbereitung zu seiner Römerbriefvorlesung eingeflossen. Der Gedanke, dass die Gerechtigkeit Gottes nicht bei Gott im Sinne einer Eigenschaft verbleibt, sondern etwas ist, das dem sündigen und damit gottfernen Menschen von Gottes Seite aus zu eigen gemacht wird und im Glauben erhalten und gelebt werden will, ist dabei einer der wesentlichen Gedanken, die Luther in dieser Schrift entgegenkommen ist. Luthers Lehre von der Rechtfertigung des Menschen bzw. von der Gerechtigkeit Gottes gewinnt hier einen entscheidenden Aspekt, tritt doch der Glaube (im Gegensatz zum Werk) deutlich in den Vordergrund. Es gilt also zu verstehen, dass Gottes Heilshandeln „pro nobis“ („für uns“) oder „pro me“ („für mich“) geschieht und im Glauben ergriffen werden möchte. Hier kommt es also auf den Einzelnen an, der ganz auf den Glauben setzt, sich also glaubend und damit bedingungslos und hoffnungsvoll in die Gottesbeziehung stellt. Auf dieser Grundlage wird der Mensch dann (wie Luther in seiner „Freiheitsschrift“ ausführt) nicht umhinkommen, seinem Nächsten zu dienen und diesem so zum Christus zu werden, wie Christus ihm selbst auch begegnet ist. Dieser Möglichkeitsraum eröffnet sich nicht zuletzt dadurch, dass Gott nun als der Schenkende erscheint, der seine Barmherzigkeit auf den sündigen Menschen ausweitet, indem er die Sünde nicht anrechnet.

### **Fragen zur Bearbeitung:**

1. Welches Menschenbild leuchtet bei Augustinus auf?
2. Welches Gottesbild beschreibt Augustinus?

3. Die Rede von der Gerechtigkeit Gottes wird bisweilen als „reformatorische Entdeckung“ verstanden. Was ist damit gemeint – und wie spricht diese „Entdeckung“ in den zeitgenössischen Kontext hinein?
4. Welche Konsequenzen ergeben sich aus diesen Gedanken zur Gerechtigkeit Gottes für die unterschiedlichen Träger des reformatorischen Geschehens?
