# Supplementary material
Source: publisher site journal article supplement (https://www.degruyterbrill.com/publication/isbn/9783110454789/downloadAsset/9783110454789_Zusatzmaterial-Grochowina_Reformation_DGS.zip)
Supplement: Supplementary file 10 [file Kapitel 5 Luther Rotten.pdf › Kapitel 5 Luther Rotten.pdf]

## **Zusatzmaterial Kapitel 5:**

### **Quelle:**

Auszug aus: Martin Luther: Wider die räuberischen und mörderischen Rotten der Bauern (1525).

„Dreyerley grewliche sunden widder Gott und menschen laden dise bawrn auff sich, dar an sie den tod verdienet haben an leybe und seele manichfeltiglich: Zum ersten, das sie yhrer oberkeyt trew und hulde geschworen haben, unterthenig und gehorsam zu seyn, wie solchs Gott gebeut, da er spricht: ‚Gebt dem Keyser, was des Keysers ist.‘ Und Ro. 13: ‚Iderman sey der oberkeyt unterthan‘ etc. Weyl sie aber disen gehorsam brechen mutwilliglich und mit frevel und dazu sich widder yhre herren setzen, haben sie da mit verwirckt leyb und seel, als die trewlose, meyneydige, lügenhaftigen, ungehorsamen buben und bosewicht pflegen zu thun, darumb auch S. Paulus Ro. 13. eyn solch urteyl uber sie fellet: ‚Wilche der gewalt widder streben, die werden eyn gericht uber sich uberkomen, Wilcher spruch auch die bawrn endlich treffen wird, es geschehe kurz odder lange, denn Gott will trew und pflicht gehalten haben.‘

Zum andern, das sie auffrur anrichten, rauben und plundern mit frevel kloster und schlosser, die nicht yhr sind, da mit sie, als die offentlichen strassen reuber und morder alleyne wol zweyfeltig den tod an leib und seele verschulden, Auch eyn auffrurischer mensch, den man des bezeugen kan, schon ynn Gotts und Keyserlicher acht ist, das, wer am ersten kan und mag den selben erwurgen, recht und wol thut, Denn uber eynen offentlichen auffrurigen ist eyn iglicher mensch beyde ober richter und scharffrichter, gleich als wenn eyn feur angehet, wer am ersten kan leschen, der ist Der best, denn auffrur ist nicht eyn schlechter mord, sondern wie eyn gros feur, das eyn land anzundet und verwustet, also bringt auffrur mit sich eyn land vol mords, blutvergissen und macht widwen und weysen und verstoret alles, wie das allergrossest ungluck. Drumb sol hie zuschmeyssen, wurgen und stechen heymlich odder offentlich, wer da kan, und gedencken, das nicht gifftiges, schedlichers, teuffelischers seyn kan, denn eyn auffrurischer mensch, gleich als wenn man eynen tolln hund todschlahen mus, schlegstu nicht, so schlegt er dich und eyn gantz land mit dyr.

Zum dritten, das sie solche schreckliche, grewliche sunde mit dem Euangelio decken, nennen sich Christliche bruder, nemen eyd und hulde und zwingen die leutte, zu solchen greweln mit yhnen zu halten, da mit sie die aller grosten Gottslesterer und schender seynes heyligen namen werden und ehren und dienen also dem teuffel unter dem scheyn des Euangelij, daran sie wol zehen mal den tod verdienen an leib und seele, das ich hesszlicher sunde nie gehoret habe, Und

achte auch, das der teuffel den iungsten tag fule, das er solch unerhorte stuck furnympt, als solt er sagen: Es ist das letzte, drumb soll es das ergste seyn, und will die grundsuppe rüren und den boden gar austossen, Got wölle yhm weren. Da sihe, wilch eyn mechtiger fürst der teuffel ist, wie er die wellt ynn henden hat und ynneynander mengen kan, Der so bald so viel tausent bawrn fangen, verführen, verblenden, verstocken und empören kan und mit yhn machen, was seyn aller wütigester grym fur nympt.“

aus: Martin Luther: Wider die räuberischen und mörderischen Rotten der Bauern, in: WA 18, 357-361, hier: 357f.

### **Information**

Luthers Schrift über die „Rotten der Bauern“ passt sich in eine Reihe von Schriften ein, in denen er sich mit den Bauernaufständen der Jahre 1524/25 auseinandersetzt. Zum Entstehungskontext dieser Schrift gehört Luthers Reise durch Thüringen, bei der er an zahlreichen Orten gegen „Aufruhr“ Stellung bezogen hat. Die Schrift macht deutlich, dass von Luthers anfänglichen Sympathien für das Anliegen der Bauern spätestens nach dieser Reise nichts mehr übriggeblieben ist, im Gegenteil: Sie kommt vielmehr einem Aufruf zur Vernichtung der Bauern gleich, wobei Luther auch und gerade die Ereignisse von Mühlhausen (und damit auch Thomas Müntzer) im Blick hatte.

### **Fragen zur Bearbeitung:**

1. Was ist Luthers konkreter Vorwurf an die Bauern? Ist dies ein eher religiös oder ein eher politisch konnotierter Vorwurf?
2. Welches Obrigkeitsverständnis Luthers leuchtet hier auf? Welche Empfehlungen ergeben sich daraus für obrigkeitliches Handeln gegenüber den Bauern?
3. In den „12 Artikeln“ fordern die Bauern u. a. die Befreiung von der Leibeigenschaft (Art. 3). Dabei berufen sie sich auf das Evangelium und die befreiende Tat Jesu am Kreuz. Welche Gegenargumente bietet Luther dazu – und wie tragfähig erscheinen diese?
