# Supplementary material
Source: publisher site journal article supplement (https://www.degruyterbrill.com/publication/isbn/9783110454789/downloadAsset/9783110454789_Zusatzmaterial-Grochowina_Reformation_DGS.zip)
Supplement: Supplementary file 11 [file Kapitel 6 EndeDerWelt.pdf › Kapitel 6 EndeDerWelt.pdf]

## **Zusatzmaterial Kapitel 6:**

### **Quelle:**

Auszug aus: Paulus von Middelburg: Ain fast nutzlich büchlin (1524)

Ich hab nuch von etlichen Jaren her enthalten hailigster vater/von den practicken zubeschreiben/ wie ich vormalen gethon hab/ auß vrsach das nur mein sinn zu besseren übungen gestanden ist/ Dieweil aber zu dieser zeyt auß verkündung deren so Astrologi genennet werden/ die ain verstand haben in der bewegung vnd lauff des hymels/ ist ain geschray erhollen das zumal ain groß gewesser vnd wie es der gemain man nennet ain Sindtfluß kommen soll/ der nahent den viertayl dieser land gegen mitternacht gelegen/ darinn wir Christen wonen zerstören soll vnd verwiesen/ das auch vil land vnn nemlich das künigreich engelland/ die größt insel in gantz Europe/ von de mer [...] bedeckt werden. [...] Dartzu haben sie verkindt ain erdbibem/dauon vil stett verderben sollen vnnd sollich alleß aus ettlichen einflussen des hymels vnn gestirn in dem jetzigen iar von der geburt Christi vnnsers herren M.D.XXiiii. in dem hornung/ Darumb vil volcks grosse furcht gefallen/ AUß sollichen vrsachen hab ich mir fürgenommen zu trost aller Christenhait ain wenig daruon zuschreyben/ das durch bemelten einfluß des hymels oder zusammenfügung aller Planeten in dem zaichen der visch/kain guß oder Sindtfluß in gemain wie sie daruon reden/ das vil ländr verwüsten soll/ oder sonderlichen daruon ain land vndergee oder vertilget wird/ wie ich das samentlich vnd sonderlich auf dz kürtest will antzaigen. [...]

Wir haben [...] oft gesehen zamentretungen Saturni vnd Jouis in wesserigen zaichen/ vnd haben doch kain sintfluß bracht [...]. Dann in den tausent vierhundert vier vnnachtzigsten iar ist beschehen ain zusammenfügung Saturni vnn Jouis in den Scorpion/ dz sie für ain wässerig zaichen haben/ vnn hat doch kain sintfluß bracht. [...]

Ich sprech auch mer/ kaine die ain stas werd ertrenken. Man sol aber die außbraitung vnn den überlauff fliessender wasser die oft beschehen nit sintfluß nennen/dann es begibt sich zu mermalen dz die flüß über die staden darinn sie vfangen außgend vnn überziehen die weite/ auch die nidern gegenden/ wie wir bei unsern zeiten gesehen haben.“

aus: Paulus von Middelburg: Ain fast nutzlich büchlin zu dieser zeit von dem Sindtfluß oder grossen Wasser, das solches durch den einfluß des Hymmels nit bezaichnet (werde) wie etlich Astrologie vorschicklich davon geschrieben. Augsburg 1524 Ai-Bii, hier: Aii/v-Bi/v (VD16 P 1064).

## **Information**

Paulus von Middelburg (1455–1534) war Astronom und bis 1494 Professor für Mathematik und Astronomie an der Universität Padua. Anschließend war er Bischof von Fossombrone, das seit 1198 unter päpstlicher Herrschaft stand, bevor es 1563 dem Erzbistum Urbino zugeschlagen wurde. Paul von Middelburg hatte dieses Amt bis zu seinem Tod 1534 inne.

1524 hat er sich in die Debatte über eine mögliche Sintflut im Jahr 1524 eingeschaltet, von der gesagt wurde, dass sie weite Teile Europas vernichten würde. Doch im Gegensatz zu manch anderen Astronomen vertrat Paul von Middelburg hier die Position, dass es zu einer solchen Sintflut nicht kommen würde. Dies belegt er in seiner Schrift durch eigene astronomische Beobachtungen und widerlegt dabei zugleich die Befunde anderer Astronomen. Allerdings ist diese Debatte für Paul von Middelburg eher von marginalem Interesse gewesen. Wichtiger war ihm sein Engagement in der Frage der – dann später erfolgenden Gregorianischen – Kalenderreform (1582), zu der er auf dem 5. Laterankonzil (1512-1517) eine eigene Schrift vorgelegt hat.

## **Fragen zur Bearbeitung:**

1. Aus welchem Grund schreibt Paul von Middelburg seine Schrift über eine mögliche Sintflut 1524? Geht es allein um die Auseinandersetzung mit anderen Astronomen?
2. Auf welchen Ebenen argumentiert er gegen eine potentielle Sintflut?
3. Vor welchem Hintergrund ist diese Schrift zu verorten – und wie ist deshalb ihre Rezeption einzuschätzen? Konnte ihr überhaupt Erfolg beschieden sein?
