# Supplementary material
Source: publisher site journal article supplement (https://www.degruyterbrill.com/publication/isbn/9783110454789/downloadAsset/9783110454789_Zusatzmaterial-Grochowina_Reformation_DGS.zip)
Supplement: Supplementary file 12 [file Kapitel 7 Frauen Argula.pdf › Kapitel 7 Frauen Argula.pdf]

## **Zusatzmaterial Kapitel 7:**

### **Quelle:**

Auszug aus: Argula von Grumbach: Dem Durchleüchtigen Hochgebornen Fürsten und herren/ Herrn Johansen/ Pfalzgrauen bey Reyn/ Herzogen zu Beyern (1523).

„Nun hab ich vnder etlichen reden von Ewer Fürstlichen gnad gemerckt/ das anfahren/ der geschrifft vnnd göttlichen worts zu leßen/ euch erkandt/ das Ewer Fürstlichen gnad/ das liecht scheinen sicht/ in wöllichem ich nitt wenig erfrewdt bin/ der Almechtig barmhertzig Gott/ wölle sollichs fürgenummen werck fruchtbarlich volstrecken/ vnd volkumner erleuchten wölliches liecht allain gott durch sein wortt muß entzünden/ vnn da ja nit bey menschlicher vernunft gesucht/ noch gefunden mag werden/ als wir dann haben an dem dreyssigsten Psalm/ Dann bey dir ist der brunn des lebens vnnd in deynem liecht weren wir sehen das liecht. Vnd an dem hundert vnd achtzehenden Psalm/ Die eröffnung deine wortt erleuchten/ vnn geben die verstentnuß den klain/ Da hören wir/ wie got nit wel leyden/ weyßhait zu jm zubringen/ sonder weyßhait von jm zu begeren/ kan nit anderst gesucht/ noch nymmermer gefunden werden/ Wir müessen ye nichts weren noch seyn/ bey vns angesehen/ Sonder pur lautter Gott suchen/ vnd jm gar nichts das vnnser fürbringen/ oder achtung darauff haben/ so leßt er sich finden vnd anderst werden wir jn nyendert finden Vnd Johannes an dem ersten. Diß ist das war liecht/ wölches alle menschen erleucht vnd darnach/ die wellt hatt jn nitt erkennt/ Sovil jn angenommen haben/ denen hatt er gewalt geben kinder Gottes zu werden etc. Der herr sagt/ wandert in dem leicht dieweil jr hapt das liecht. Ich bit Ewer Fürstliche gnad durch Gott/ disen spruch wol inn das hertz zu trucken/ Matthey an dem zehenden/ Wer mich bekennt vor den menschen/ will ich auch bekennen vor meynem hymlichen vatter/ Wer nit/ den will gott auch nit erkennen. Braucht den oft in disem Reychstag frey vnerschrocken/ dann Gott ist mitt vns [...] Nun haben wir/ gott sey ewig lob/ das auff gericht hayl/ das wort gotts ist am tag/ darumb werden wir kaynen gewallt fürchten/ Sonder frölich für alle gwaltige angesicht vnerzyteret treten/ Wann vnd wie oft man will Ewer Fürstlichen gnad helffen vnnd ratten/ damit das reych Gottes den armen nit werd verspert/ vnd ij sampt vns/ nit verderben. Hab nit lassen mügen Ewer Fürstlichen gnad/ vor mit dieser ermanung zu gesegen/ wöllichem ich mich beuilch/ vnd vns alle in die güttigen fraindtligkait Christi. Actum/ am Afftermontag nach Andree. Anno domini M.D.xxiii.“

aus: Argula von Grumbach: Dem Durchleüchtigen Hochgebornen Fürsten und herren/ Herrn Johansen/ Pfalzgrauen bey Reyn/ Herzogen zu Beyern/ Grafen zu Spanhaym etc. Meynem Gnedigsten Herren. [Augsburg 1523]. (VD16 G 3666).

### **Information**

Argula von Grumbach hat sich nicht allein in die Auseinandersetzungen um Arsacius Seehofer an der Universität Ingolstadt (1523/24) eingeschaltet, sondern auch zu weiteren Herrschaftsträgern des Alten Reiches Kontakt aufgenommen, um sie für die reformatorische Sache zu gewinnen. Einer von diesen war Johann von Pfalz-Simmern (1492–1557), der zwar katholisch und bei Karl V. wohlgelitten war, aber durch seine Anwesenheit auf den Reichstagen in Worms (1521) und Nürnberg (1522, 1523, 1524) für Argula von Grumbach interessant wurde. Zudem unterstellt sie ihm in ihrem Brief, dass er durchaus der reformatorischen Botschaft zugeneigt sei, habe er doch das nun scheinende Licht gesehen, was sie sehr erfreuen würde. Folgerichtig schließt sich genau hier ihre Bitte an, dass Gott nun sein Werk vollstecken, also vermutlich den Fürsten gänzlich für sich gewinnen solle, so dass dieser sich dann ganz auf die Seite der Reformatoren schlagen würde. Argula von Grumbach hat Johann von Pfalz-Simmern vermutlich 1523 auf dem Reichstag in Nürnberg getroffen, der Brief folgte möglicherweise recht zeitnah nach dieser Begegnung.

Dass Argula von Grumbach sich an den Fürsten gewandt hat, zeigt nicht nur, dass sie offenbar auf dem diplomatischen Parkett zu Hause war, sondern es macht auch deutlich, dass sie sich gleichsam befähigt und wohl auch berufen sah, selbst den Herrschenden im Reich eine „Ermahnung“ zukommen zu lassen, dass diese das Licht Gottes erkennen und darin „wandern“ sollten. Dabei hat ihr politisches Interesse sicherlich darin gelegen, Johann von Pfalz-Simmern für das reformatorische Geschehen zu gewinnen, doch der Text selbst argumentiert allein mit religiös konnotierten Figuren, indem er an zahlreichen Stellen auf das Licht, das Bekenntnis zu Gott, das Wort Gottes und auf das schon jetzt aufgerichtete Heil verweist. Psalmen und das Evangelium nach Johannes untermauern ihre „Ermahnung“, die auf weit mehr als ein gottesfürchtiges Leben zielt. Insbesondere der Verweis auf das Wort Gottes, dem „allain“ zu folgen sei, legt nahe, dass es hier explizit darum ging, den Fürst gänzlich für das reformatorische Geschehen zu gewinnen.

Eine Antwort auf diese „Ermahnung“ existiert nicht. Dennoch ist das Schreiben gedruckt worden. Dies lässt vermuten, dass die – nunmehr breite – Leserschaft erkennen sollte, dass die reformatorische Botschaft selbst in den Kreisen der Herrschenden Thema war und hier durchaus Unterstützer zu finden waren.

**Fragen zur Bearbeitung:**

1. Welche politische Agenda verfolgt Argula von Grumbach in dem Brief? Wo und wie zeigt sich diese?
2. Welches Verständnis von der reformatorischen Botschaft präsentiert Argula von Grumbach in dem Brief?
3. An welchen Punkten überschreitet Argula von Grumbach die Grenzen der zeitgenössisch gegebenen Geschlechterhierarchie? Wie zeigt sich das in ihrer Sprache und in inhaltlichen Setzungen? Wo und wie erfolgt eine Problematisierung?
