# Supplementary material
Source: publisher site journal article supplement (https://www.degruyterbrill.com/publication/isbn/9783110454789/downloadAsset/9783110454789_Zusatzmaterial-Grochowina_Reformation_DGS.zip)
Supplement: Supplementary file 13 [file Kapitel 8 Zwingli Thesen.pdf › Kapitel 8 Zwingli Thesen.pdf]

## Zusatzmaterial Kapitel 8:

### Quelle:

Auszug aus: 67 Thesen Zwinglis [zur ersten Zürcher Disputation, 29. Januar 1523]

Dis nachbestimpten artikel und meinungen bekenn ich, Huldrich Zuingly, mich in der loblichen statt Zürich geprediget haben, uß grund der geschrift, die theopneustos - das ist: vonn gott ingesprochen - heißt, und embüt mich mitt dero genante artickel ze beschirmen und erobren. Und wo ich ietz beruerte gschrift nit recht verstuonde, mich bessers verstands, doch uß egedachter gschrift, berichten lassen. 1. Alle, so redend, das euangelium sye nüt on die bewernus der kilchen, irrend und schmähend gott. 2. Summa des euangelions ist, das unser herr Christus Jhesus, warer gottes sun, uns den willen sines himmlischen vatters kundt gethon unnd mit siner unschuld vom tod erlöst und gott versuent hat. 3. Dannenher der einig weg zur sälligkeit Christus ist aller, die ie warend, sind und werdend. 4. Welcher ein andre thür suocht oder zeygt, der irt, ja ist ein mörder der seelen und ein dieb. 5. Darumb alle, so ander leeren dem euangelio glych oder höher messend, irrend, wissend nitt, was euangelion ist. 6. Dann Christus Jesus ist der wägfuerer und hauptman allem menschlichen geschlecht vonn gott verheyssen, unnd ouch geleistet.

7. Das er ein ewig heyl und haupt sye aller gläubigen, die sin lychnam sind, der aber tod ist und nütz vermag on in. 8. Uß dem volgt: Zuo eim, das alle, so in dem haupt läbend, glider und kinder gottes sind, und das ist die kilch oder gemeinsame der heyligen, ein hußfrouw Christi: Ecclesia catholica. 9. Zum andren, das, wie die lyblichen glyder on verwalten des haupts nüt vermögend, also in dem lyb Christi nieman ütgid vermag on sin haupt Christum. 10. Wie der mensch toub ist, so die glider etwas on das haupt würckend, rissend, wudent, schedigend sich selbs, also, wenn die glider Christi etwas on ir haupt Christum understond, sind sy toub, schlahend und beschwärend sich selbs mit unwysen gesatzten. 11. Dannenhar wir sehend der geistlichen genennet satzungen von irem pracht, rychtagen, stenden, titlen, gesatzten ein ursach aller unsinnigkeit sin; dann sy dem haupt nit mithellend. 12. Also tobend sy noch, nit vonn des haupts wegen - denn das flyßt man sich uß gnaden gottes zuo disen zyten harfür ze bringen -, sunder das man sy nummen wil lassen toben, aber dem haupt einig loßen. 13. Wo dem geloset wirt, erlernet man luter und clarlich den willen gottes, und wirt der mensch durch sinen geist zuo im gezogen und in inn verwandelt. 14. Darumb alle Christenmenschen iren höchsten flyß ankeren söllend, das euangelion Christi einig geprediget werde allenthalb. 15. Dann in deß glouben stat unser heyl, und unglouben unser verdammus; dann alle warheit ist clar in im. 16. Im euangelio lernet man, das menschen lere und satzungen zuo der sälligkeit nüt nützend.

[Vom bapst.] 17. Das Christus ein einiger ewiger obrester priester ist; daruß ermessen würt, daß, die sich obrest priester ußgeben hand, der eer und gewalt Christi widerstreben, ja verschupfen. [Von

*der meß.]* 18. Daß Christus sich selbs einest uffgeopfert, in die ewigheit ein wärend und bezalend opfer ist für aller gloubigen sünd; darus ermessen würt, die meß nit ein opfer, sunder des opfers ein widergedechnuß sin und sichrung der erlösung, die Christus unß bewisen hatt. [*Von fürbitt der heyligen.*] 19. Das Christus ein einiger mitler ist zwüschend gott unnd uns. 20. Das uns gott alle ding wil in sinem namen geben; darus entspringt, das wir usserthalb diser zyt keines mitlers dörfend denn sin. 21. Das, so wir für einander uff erden bittend, das in der gestalt thueend, das wir allein durch Christum uns alle ding gegeben werden vertruwent. [*Von den guoten wercken.*] 22. Daß Christus unser gerechtikeit ist; darus wir ermessen, daß unser werck so vil guot, so vil sy Christi, so vil sy aber unser, nit recht, nit guot sind. [...]

[*Von kutten, kleidung, zeichen.*] 26. Daß got nüt mißvelliger ist weder glychsnen; dannenhar erlernt, das alles, so sich schönt vor den menschen, ein schwäre glichßnery und verruochte ist. Hie vallend kutten, zeichen, platten etc. [*Von orden und secten.*] 27. Das alle Christenmenschen brueder Christi unnd sy under einander sind, keinen vatter uffblasen söllend uff erden. Da vallend hin örden, secten, rotten. [*Von der geistlichen ee.*] 28. Das alles, so got erloubt oder nit verboten hat, recht ist; dannenhar die ee allen menschen zimmen erlernet würt. 29. Das alle, die man geistlich nennet, sündend, wenn sy, nachdem sy innen worden sind, das inen got reinikeit halten abgeschlagen hatt, sich nit mit der ee verhuetend.

[*Vom glübd der reynigkeit.*] 30. Das die, so reynigkeit verheissend, sich kintlich oder närrisch ze vil übernehmen; darus erlernet, das, die söliche glübd innemend, frävenlich an den frummen menschen farend. Von dem bann. 31. Das den bann kein besunder mensch yeman ufflegen mag, sunder die kilch, das ist gemeinsame dero, under denen der bann wirdig wonet, mit sampt dem wächter, das ist pfarrer. 32. Daß man allein den bannen mag, der offenlich verergeret. [*Von unrechtfertigem guot.*] 33. Das unfertig guot nit templen, clöstern, münchen, pfaffen, nonnen, sunder den dürfftigen geben sol werden, so es dem rechten besitzer nit widerkert werden mag.

Von oberkeit. 34. Der geistlich genempt gewalt hat sines prachts keinen grund uß der leer Christi, 35. aber der weltlich hat krafft und bevestigung uß der leer unnd that Christi. 36. Alles, so der geistlich genempt stat im zuogehören rechtes und rechtes schirm halb fürgibt, gehört den weltlichen zu, ob sy Christen sin wöllend. 37. Inen sind ouch schuldig alle Christen ghorsam ze sin, niemand ußgenummen, 38. so ferr sy nüt gebietend, das wider got ist.

39. Darumb söllend all ire gesatz dem götlichen willen glychförmig sin, also, das sy den beschwärten beschirmend, ob er schon nüt klagte. 40. Sy mögend allein mit recht tödten, ouch allein die, so offenlich verergerend, got unerzürnt, der heisse denn ein anders. 41. Wenn sy recht ratt und hilff zuodienend denen, für die sy rechnung geben werdent vor gott, so sind ouch dise inen schuldig liblich hantreichung ze thuon. 42. So sy aber untrüwlich und usser der schnuor Christi faren wurdend, mögend sy mit got entsetzt werden. 43. Summa: Deß ryche ist aller best unnd vestest, der allein mitt gott herschet, und deß aller bösest unnd unstätet, der uß sinem gmuet. [...]

Von abstellung der mißbrüchen. 64. Alle, so ir irrung erkennend, soll man nüt lassen entgelten, sunder sy im fryd sterben lassen, und demnach die wydem christenlich verordnen. 65. Die sich nit erkennen wöllend, wirt got wol mit inen handlen. Darumb man mitt iren lyben keinen gewalt fürnemen soll, es wäre dann, das sy so ungestaltdtlich fürend, das man deß nit embären möcht. 66. Es sölle alle geistlich fürgesetzten sich ylentz nyderlassen unnd einig das crütz Christi, nit die kisten, uffrichten, oder sy gond umb. Die ax stat am boum. 67. Ob yemand begerte, gespräch mitt mir ze haben von zinsen, zehenden, von ungetoufften kindlinen, vonn der firmung, embüt ich mich willig zuo antwurten. Hie ndernem sich keiner zuo stryten mit sophistry oder menschentandt, sunder kömme die geschriff für ein richter ze haben, damit man die warheit oder find, oder, so sy funden ist - als ich hoff - behalt. Amen. Des walt gott.

aus: Ulrich Zwingli: 67 Thesen, in: Huldreich Zwinglis sämtliche Werke. Bd. 1. (Corpus Reformatum, 88). Berlin 1905, 458-465.

### **Informationen**

Die 67 Thesen Zwinglis sind zwar für die Zürcher Disputation entstanden, aber im vollen Umfang sind sie dort gar nicht verhandelt worden. Dazu war wohl auch die Situation zu prekär, in der die Disputation stattfand, denn hier mussten erst einmal grundsätzliche Frage geklärt werden: Wer durfte über die Rechtmäßigkeit des Glaubens in der Stadt entscheiden? Welche Rolle sollte der Rat der Stadt dabei spielen? Wie war das Verhältnis zum Bischof von Konstanz auszugestalten? Und nicht zuletzt: War die Lehre, die Zwingli in der Stadt predigte, als rechtmäßig anzusehen – und sollte er seine Tätigkeit fortsetzen dürfen?

Vor diesem Hintergrund verwundert es nicht, dass zahlreiche Menschen nach Zürich gekommen sind, um der Disputation beizuwohnen, die am Morgen des 29. Januars 1529 begann, am Mittag aber auch schon wieder zu Ende war – und zwar durch einen Urteilsspruch des Zürcher Rats. Somit war klar, dass sich fortan – und wie bisher – der Rat als die Autorität verstehen würde, welche in der Stadt über den Glauben entschied. Dass die Vertreter des Konstanzer Bischofs genau dies bestritten und darauf verwiesen haben, dass eine solche Handlungsweise nicht mit den Vorstellungen der Kirche in Einklang zu bringen wäre, spielte dabei keine Rolle. Zwingli selbst hat mit seinen Thesen den Rat gestützt: Diesem, so Zwingli, käme alle Macht zu, sofern er nicht etwas entscheide, was sich gegen Gott richte.

Am Ende stand also der Rat als Sieger da, das Zürcher Staatskirchentum konnte sich nun entfalten. Aber auch Zwingli ging gestärkt aus der Disputation hervor, konnte er doch nun offiziell und weiterhin ungehindert seinen Dienst fortsetzen.

**Fragen zur Bearbeitung:**

1. Welche Grundlage des Glaubens legen die 67 Thesen? Welche Lehrsätze Zwinglis leuchten hier auf?
2. Welche Haltung wird in den Thesen deutlich gegenüber der Obrigkeit, der katholischen Kirche, der Orden?
3. Welche Schlüsse lassen sich aus den Thesen für die Reformation in der Stadt Zürich ziehen? Welche Gestalt sollte diese gewinnen? Was sollte vermieden werden?
