# Supplementary material
Source: publisher site journal article supplement (https://www.degruyterbrill.com/publication/isbn/9783110454789/downloadAsset/9783110454789_Zusatzmaterial-Grochowina_Reformation_DGS.zip)
Supplement: Supplementary file 14 [file Kapitel 9 Brenz Turk.pdf › Kapitel 9 Brenz Turk.pdf]

## **Zusatzmaterial Kapitel 9:**

### **Quelle:**

Auszug aus: Johannes Brenz: Wie sich Prediger und Leyen halten sollen/ so der Türck das Teutschland vberfallen würde (1531).

„Dieweyl aber nu das gemeyn geschrey ist/ Der Türck fare daher/ wölle das gantz Teutsche land verfallen/ Wie sollen jm die prediger/ auch andere Gotfürchtige leut thun/ Sollen sie predigen/ das man sich mit gewerter handt wider den Türcken so stellen/ Oder jm gleych thür und thor auffsperrren/ wenn er daher feret. [...]

Antwort. Das Teutsche land steckt voller bößheyt/ hat alle büberey seer vberhandt genummen bey Oberkeyt vnd vnterthan. Darzwischen ist das Euangelion em Teudtschen land geoffenbaret/ welches hoch geschmecht vnd als ketzerey geschendet wirt. Darumb will unser Herr got seyner alten gewonheyt nachfaren/ So ist ver das Teudtsche landt ein mechtige grosse straff vorhanden und zukünfftig/ Denn es ist Gottes gewonheyt allzeyt gewesen/ das er zuuor eynem land so mit bößheyt erfülle ware/ hat lassen das wort Gottes verkünidgen/ vnd so es nicht geschaffet/ sondern vi mehr verschmehet ist worden/ hat er seyn straff darauff geschickt. [...]

So gepürt es einem rechtschaffen prediger seyn volck zu ermanen/ das sie sich bessern vnd von den greulichen sunden ablassen/ Denn nach anzeygung aller ding sey ein straff Gottes vorhanden/ welche aber wol müg gewendet werden/ durch besserung des lebens. [...] Darüber sind die Prediger auch schuldig den Keyser vnd die Fürsten ernstlich zu vermanen/ jr ampt außzürichten dem Türcken mit dem schwerdt widerstandt zu thun/ vnd sollen hierinn nicht ansehen/ ob vielleycht des Türcken macht grösser were/ sonder sollen Gottes befelch vnd gepot folge thun/ und darauff jren trost setzen/ vnd glauben Got werde jn helffen wider die mörderischen türcken streyten/ Vnd sind die unterthan schuldig mit leyb vnd gut/ jren herren zu helffen/ vnd jr selbs weyb und kinder zu retten/ Vnd dieser gehosam ist ein gutheylig werck/ das ob schon eyner darinn vmb kummt/ sol er nicht zweyffeln/ er sterbe in Gottes gehorsam/ vnd so er sunst an Christum wahrhafftigh glaubet/ wirt er on zweyfel selig. Dis ist ein rechter Christlicher trost/ der allen frummen kriegern/ Herren und knechten ein freydig hertz machen kan/ so sie bedenken/ das sie Gott mit sich haben/ vnd in Göttlichem gehorsam streyten.“

aus: Johannes Brenz: Wie sich Prediger und Leyen halten sollen/ so der Türck das Teutschland vberfallen würde. Christliche und notturftige vnterricht. Wittenberg 1531, Ai-Biii, hier: Aii-Aiii. (VD16 B 7985).

## **Informationen**

„Der Türke“ war im 16. Jahrhundert ein erklärtes Feindbild, das sogar die Kraft hatte, konfessionelle Gegensätze zu überbrücken, weil im Alten Reich der Eindruck entstanden ist, gemeinsam einer existentiellen Gefährdung ausgesetzt zu sein. Die Publikationen, die sich insbesondere in der zweiten Hälfte des 16. Jahrhunderts mit der militärischen Schlagkraft „des Türken“, aber auch mit der vermeintlich bedrohten christlichen Identität befassen, sind unter dem Stichwort der „Türkenbüchlein“ zu fassen. Doch auch die Reformationszeit kannte diese Schriften: Martin Luther, Johannes Brenz und andere Theologen zeichneten hier nicht allein ein Bild vom „Türken“, sondern betonten auch, dass sich diese Gefahr nur ergeben hätte, weil in „Teutschlandt“ sowohl die Obrigkeiten als auch die Untertanen zu lax im christlichen Glauben stünden. So sei „der Türke“ auch als eine Strafe Gottes zu verstehen, um zu Buße und Umkehr zu mahnen. Vor diesen Hintergrund erscheint es als folgerichtig, dass „der Türke“ nicht selten auch mit dem Ende der Welt in Verbindung gebracht wurde.

Johannes Brenz (1499–1570) ist ein wichtiger Vertreter dieser Richtung. Seine Schrift von 1531 nutzte er dafür, insbesondere der Obrigkeit deutlich zu machen, dass sie für den Frieden zuständig sei, indem sie nicht zuletzt die Untertanen vor Gewalt schützte. Gegenüber „dem Türken“ sei dies besonders wichtig, denn – so Brenz – dieser zeichne sich durch eine besondere Brutalität aus, so dass nur besonders „heroische“ Menschen (oder Obrigkeiten) diesem etwas entgegensetzen könnten.

## **Fragen zur Bearbeitung:**

1. Wie charakterisiert Brenz „den Türken“ in seiner Schrift?
2. Welche Gründe führt Brenz für die Gefährdung an – und welche Lösungen sieht er?
3. Mit welchen kommunikativen Strategien versucht Brenz, für seine Position zu werben?
4. Diskutieren Sie vor dem Hintergrund der Ereignisse 1529/30, dass die „Türkengefahr“ das Potential hatte, konfessionelle Grenzen und Streitigkeit in den Hintergrund treten zu lassen.
